# Supplementary material for: HDAC1 SUMOylation promotes Argonaute-directed transcriptional silencing in C. elegans
Source: eLife. 2021 May 18;10:e63299. doi: 10.7554/eLife.63299 (PMC8131101; doi:10.7554/eLife.63299)
Supplement: Figure 2—source data 1. [file elife-63299-fig2-data1.xlsx]

## Sheet: Sheet1
Brood size at 20 degree						Brood size at 25 degree
	wild-type	hda-1[KKRR]	hda-1[KKRR]::smo-1	hda-1::smo-1			wild-type	hda-1[KKRR]	hda-1[KKRR]::smo-1	hda-1::smo-1
#1	215	163	338	312		#1	238	139	197	205
#2	314	262	160	253		#2	233	83	126	209
#3	312	315	288	287		#3	186	167	160	213											183
#4	341	310	308	231		#4	243	105	202	171
#5	402	251	300	280		#5	103	138	204	163
#6	329	275	283	244		#6	155	130	174	134
#7	344	293	300	288		#7	200	127	220	205
#8	343	136	291	239		#8	197	139	219	204
#9	427	200	297	260		#9	205	113	105	234
#10	325	225	369	295		#10	125	178	226	164
#11	381	234	314	152
#12	352	284	319	148
#13	323	278	286	205
#14	336	136	330	342
#15	347	248	302	281
#16	319	265	278	277
#17	292	244	183	291
Germline mortality assay
wild-type	#1	#2	#3	#4	#5	#6	#7	#8	#9	#10
Generation 1	238	233	186	243	103	155	200	197	205	125
Generation 2	187	190	258	196	181	218	205	288	203	209
Generation 3	136	160	156	139	143	163	150	123	189	125
Generation 4	106	32	116	101	136	106	106	119	129	89
Generation 5	61	64	136	113	107	80	166	117	84	22
Generation 6	100	109	31	127	140	140	149	155	47	0
Generation 7	44	81	116	127	99	108	114	85	0
Generation 8	111	102	129	171	99	137	157	0
hda-1[KKRR]	#1	#2	#3	#4	#5	#6	#7	#8	#9	#10
Generation 1	139	83	167	105	138	130	127	139	113	178
Generation 2	1	15	170	116	162	141	180	116	147	68
Generation 3	64	74	92	112	20	1	107	0	0	101
Generation 4	46	21	30	64	23	14	2	0	0	0
Generation 5	43	30	19	0	0	0	0	0	0	0
Generation 6	7	0	0	0	0	0	0	0	0	0
Generation 7	9	0	0	0	0	0	0	0	0	0
Generation 8	0	0	0	0	0	0	0	0	0	0
hda-1[KKRR]::smo-1	#1	#2	#3	#4	#5	#6	#7	#8	#9	#10
Generation 1	197	126	160	202	204	174	220	219	105	226
Generation 2	93	5	140	184	217	179	207	213	103	150
Generation 3	130	39	103	178	35	89	180	6	8	0
Generation 4	68	21	3	23	0	0	0	0	0	0
Generation 5	40	1	0	0	0	0	0	0	0	0
Generation 6	2	0	0	0	0	0	0	0	0	0
Generation 7	3	0	0	0	0	0	0	0	0	0
Generation 8	0	0	0	0	0	0	0	0	0	0
hda-1::smo-1	#1	#2	#3	#4	#5	#6	#7	#8	#9	#10
Generation 1	205	209	213	171	163	134	205	204	234	164
Generation 2	195	95	120	83	226	164	160	100	149	141
Generation 3	146	89	97	79	143	164	98	87	163	166
Generation 4	20	77	17	20	42	18	88	19	0	0
Generation 5	38	16	1	0	0	0	0	0	0	0
Generation 6	30	3	0	0	0	0	0	0	0	0
Generation 7	32	0	0	0	0	0	0	0	0	0
Generation 8	16	0	0	0	0	0	0	0	0	0
wago-9/hrde-1(tm1200)	#1	#2	#3	#4	#5	#6	#7	#8	#9	#10
Generation 1	154	95	69	26	21	103	26	123	154	121
Generation 2	5	0	0	0	0	0	0	0	0	0
Generation 3	0
